# Supplementary material for: Quantitative dose-response analysis untangles host bottlenecks to enteric infection
Source: PubMed Central journal article supplement (PMC9884216; doi:10.1038/s41467-023-36162-3), 2023-01-28
Supplement: 41467_2023_36162_MOESM1_ESM.pdf [file 41467_2023_36162_MOESM1_ESM.pdf]

Supplementary Information

**Quantitative dose-response analysis untangles host bottlenecks to enteric infection**

Ian W. Campbell, Karthik Hullahalli, Jerrold R. Turner, and Matthew K. Waldor\*

\*mwaldor@research.bwh.harvard.edu

# Supplement 1

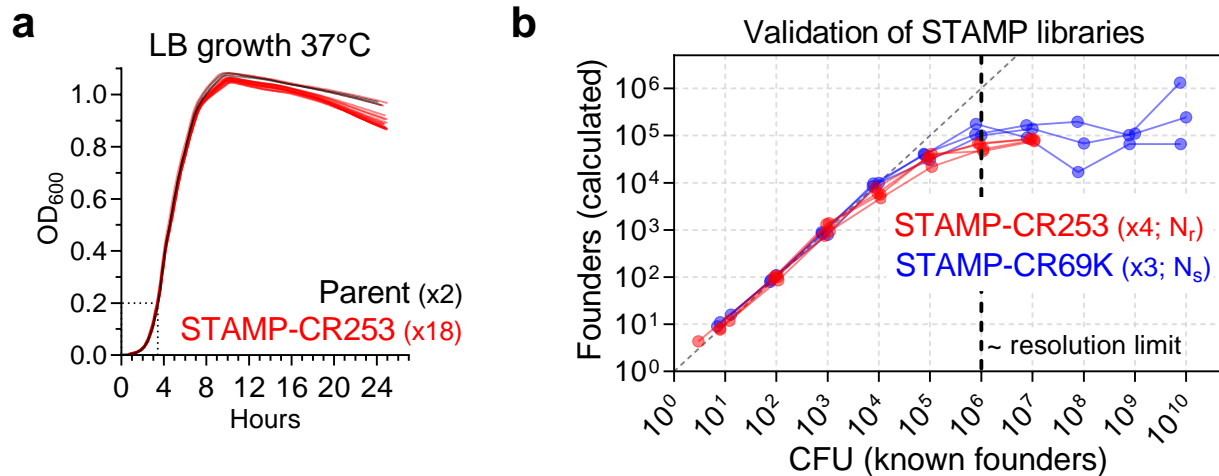

## Supplemental figure 1. Validation of *Citrobacter rodentium* STAMP libraries.

(a) Growth of STAMP-CR253 library compared to the parental, untagged strain. Growth curve performed in 96 well plate reader at 37°C, shaking, in LB. 18 clones (colonies) from STAMP library and 2 from parent. Lines are means of triplicate samples.

(b) The ability to determine the size of the founding population from STAMP libraries was validated in culture by comparing the number of plated colonies (CFU; known number of founders) to the size of the founding population following processing of those plated populations (calculated founders). Without calibration, STAMP accurately determined the number of founders up to  $\sim 10^4$  CFU and plateaued at  $\sim 10^6$  CFU. Therefore, these values can be used to calibrate future experiments to determine the size of founding populations up to  $10^6$ , with increased uncertainty above  $10^4$ . STAMP-CR253 (253 unique barcodes) founders (N<sub>r</sub>) measured for 4 cultures across 7 doses. STAMP-CR69K ( $\sim 69,000$  unique barcodes) founders (N<sub>s</sub>) measured for 3 cultures across 10 doses.

Source data are provided as a Source Data file.

## Supplement 2

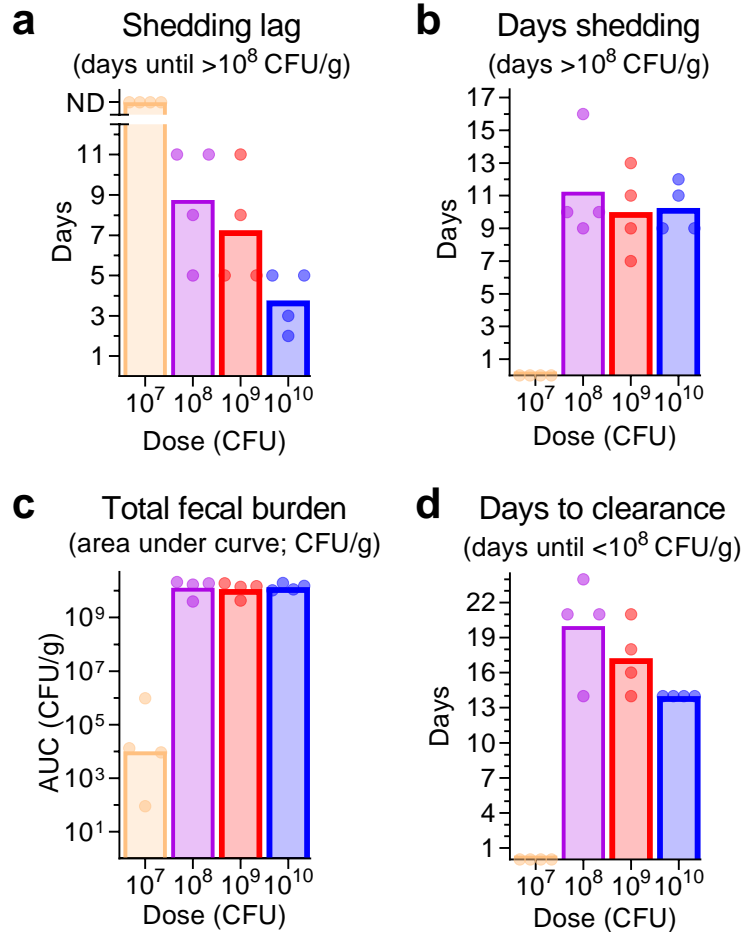

### Supplemental figure 2. Additional data related to shedding of C57BL/6J mice in Figure 2.

In C57BL/6J mice inoculated with a high enough dose to cause infection ( $\geq 10^8$  CFU), dose impacts the lag between inoculation and peak shedding (**a**) and the lag between inoculation and clearance (**d**) but does not change the days of peak shedding (**b**) or the total fecal burden (**c**). 4 animals per dose. (**a**, **b**, **d**) Arithmetic mean, (**c**) geometric mean.

Source data are provided as a Source Data file.

# Supplement 3

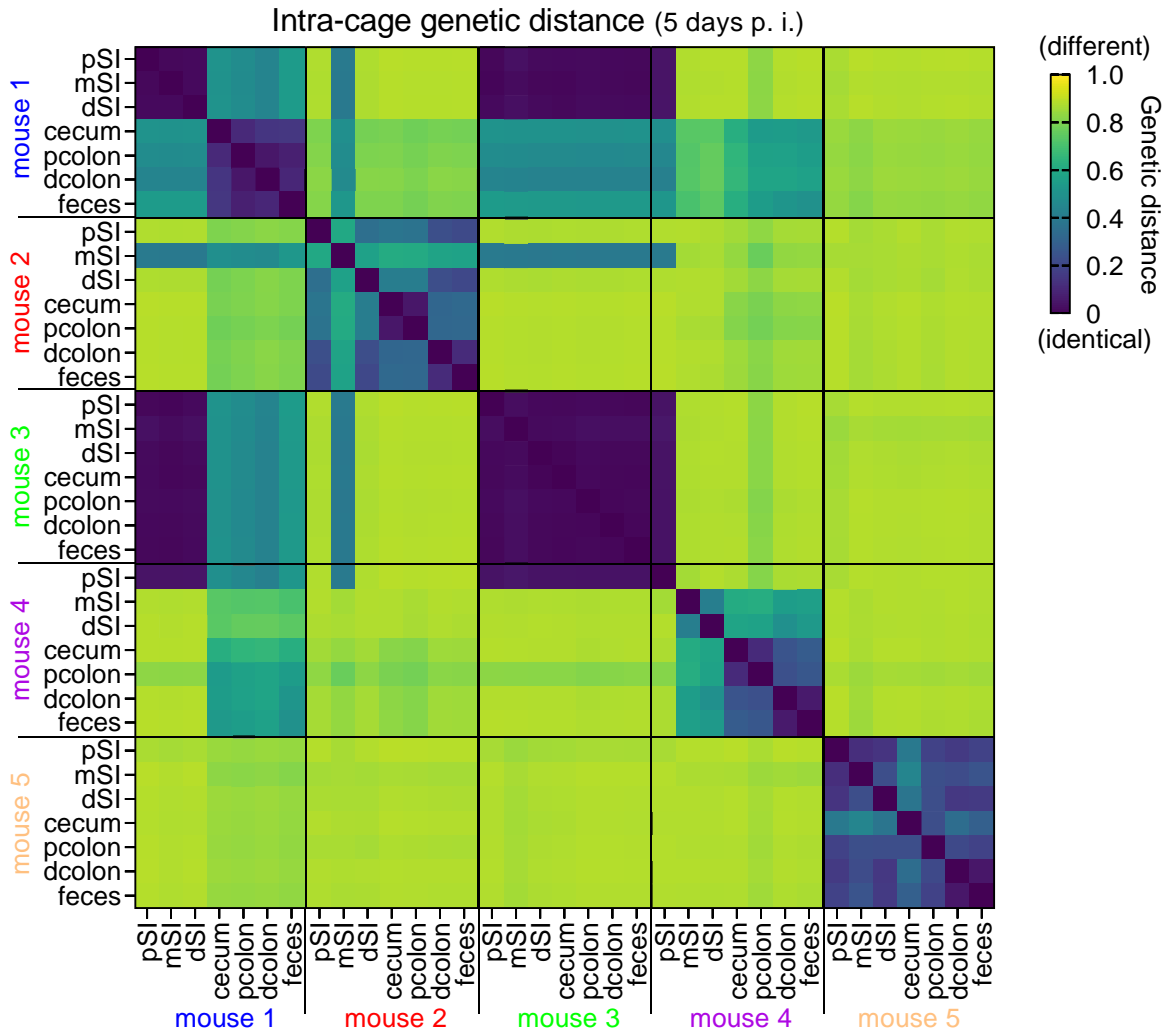

**Supplemental figure 3. All intra-cage relationships from Figure 4a-e.**

Comparison by genetic distance of *C. rodentium* populations 5 days post inoculation in 5 cohoused (intra-cage) C57BL/6J mice inoculated with STAMP-CR253. Zero indicates no difference between populations (identical).

From proximal (p) to distal (d): p small intestine (SI), mid (m) SI, dSI, cecum, pcolon, dcolon, feces.

Source data are provided as a Source Data file.

## Supplement 4

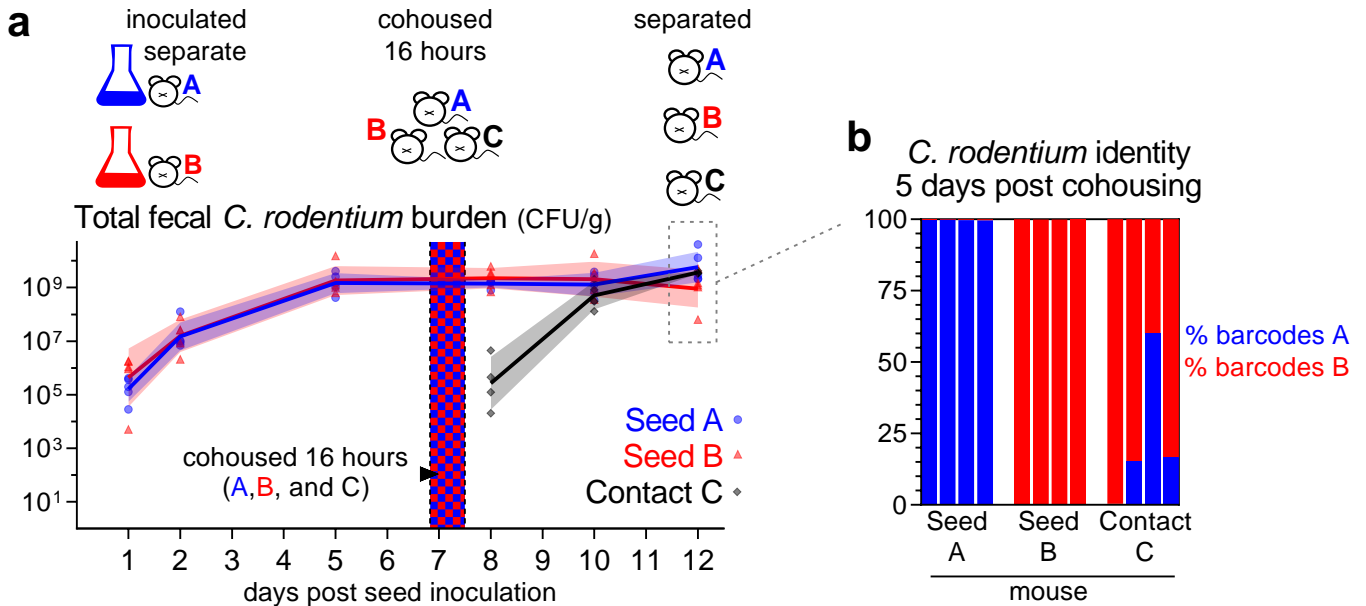

### Supplemental figure 4. Super-colonization resistance prevents cohoused mice from sharing *C. rodentium* populations.

To test transmission of *C. rodentium* to already infected mice, two cages of 4 C57BL/6J mice (seeds A and B) were separately inoculated with mixed pools of barcoded strains (barcodes A and B). Barcodes A and B are each a group of 3 separate strains with non-redundant barcodes. Seed animals A and B were separated until peak colonization. On the 6<sup>th</sup> day after seed inoculation, the mice were re-arranged to cohause 1 mouse each of seed A, seed B, and uninfected contact C overnight for 16 hours. The next morning, they were separated, housing the A seeds together, the B seeds together, and the C contacts together. 12 days post seed inoculation (5 days post cohousing) the fecal *C. rodentium* populations were analyzed to determine the contribution from pools A and B. <1% of reads from seed A mice were contributed by the B barcodes and vice versa. (a) Shedding data is presented as geometric means and standard deviations. Source data are provided as a Source Data file.

## Supplement 5

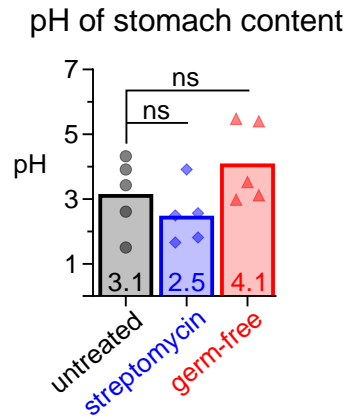

### Supplemental figure 5. The effect of microbiota on gastric acid.

Conventional, untreated C57BL/6J mice have similar stomach acidity as mice treated for 3 days with the antibiotic streptomycin (as in Figure 6) or mice lacking a microbiota (germ-free, as Figure 7). pH measured post-mortem in aspirated stomach fluid. Boxes are arithmetic means. One-way ANOVA adjusted  $p$ -values 0.54 (streptomycin) and 0.32 (germ-free), not significant (ns). 5 animals per group. Source data are provided as a Source Data file.

Supplemental table 1

| microbiota            | days p. i. | cage         | mouse    | variation          | genomic change              | annotation                  | coding change | amino acid change |            |
|-----------------------|------------|--------------|----------|--------------------|-----------------------------|-----------------------------|---------------|-------------------|------------|
| SPF<br>C57BL/6J       | 5<br>days  | A            | A1       | complex            | g.3081146..3081467          | intergenic                  |               |                   |            |
|                       |            |              | A2       | none               |                             |                             |               |                   |            |
|                       |            |              | A3       | SNV                | g.388509C>G                 | <i>lamB</i>                 | c.766G>C      | p.Val256Leu       |            |
|                       |            |              | A4       | none               |                             |                             |               |                   |            |
|                       |            | B            | B1       | none               |                             |                             |               |                   |            |
|                       |            |              | B2       | none               |                             |                             |               |                   |            |
|                       |            |              | C        | C1                 | SNV                         | g.527543C>T                 | <i>panE</i>   | c.232G>A          | p.Asp78Asn |
|                       |            |              |          | C2                 | none                        |                             |               |                   |            |
| C3                    | SNV        | g.330872T>C  |          | <i>ROD_03001</i>   | c.557A>G                    | p.Glu186Gly                 |               |                   |            |
|                       | SNV        | g.4274290A>G |          | <i>dgoT</i>        | c.442A>G                    | p.Arg148Gly                 |               |                   |            |
| C4                    | none       |              |          |                    |                             |                             |               |                   |            |
| germ-free<br>C57BL/6J | 20<br>days | C            | C1       | deletion           | g.3100349..3180553          | multiple<br>(including LEE) |               |                   |            |
|                       |            |              |          | SNV                | g.4029101C>T                | <i>glpK</i>                 | c.1000C>T     | p.Pro334Ser       |            |
|                       |            |              |          | SNV                | g.5295383C>T                | intergenic                  |               |                   |            |
|                       |            |              | C2       | deletion           | g.3100349..3180553          | multiple<br>(including LEE) |               |                   |            |
|                       |            |              |          | SNV                | g.4029101C>T                | <i>glpK</i>                 | c.1000C>T     | p.Pro334Ser       |            |
|                       |            |              |          | SNV                | g.5295383C>T                | intergenic                  |               |                   |            |
|                       |            |              | C3       | deletion           | g.3100349..3180553          | multiple<br>(including LEE) |               |                   |            |
|                       |            |              |          | SNV                | g.4029101C>T                | <i>glpK</i>                 | c.1000C>T     | p.Pro334Ser       |            |
|                       |            |              |          | SNV                | g.5295383C>T                | intergenic                  |               |                   |            |
|                       |            | C4           | deletion | g.3100349..3180553 | multiple<br>(including LEE) |                             |               |                   |            |
|                       |            |              | SNV      | g.4029101C>T       | <i>glpK</i>                 | c.1000C>T                   | p.Pro334Ser   |                   |            |
|                       |            |              | SNV      | g.5295383C>T       | intergenic                  |                             |               |                   |            |
|                       |            | D            | D1       | SNV                | g.4270455T>A                | <i>dgoR</i>                 | c.143T>A      | p.Val48Glu        |            |
|                       |            |              |          | SNV                | g.4274290A>G                | <i>dgoT</i>                 | c.442A>G      | p.Arg148Gly       |            |
|                       |            |              |          | SNV                | g.4634927C>T                | <i>gntU</i>                 | c.895C>T      | non-coding        |            |
|                       |            |              |          | insertion          | g.5407322^5407357           | intergenic                  |               |                   |            |
|                       |            | E            | E1       | deletion           | g.3100354...319782<br>3     | multiple<br>(including LEE) |               |                   |            |
|                       |            |              |          | insertion          | g.4989831^4989834           | <i>gatZ</i>                 |               |                   |            |
|                       |            | F            | F1       | deletion           | g.3100357..3198048          | multiple<br>(including LEE) |               |                   |            |
|                       |            |              |          | SNV                | g.3937003C>T                | <i>purH</i>                 | c.837C>T      | non-coding        |            |
|                       |            |              |          | SNV                | g.4274290A>G                | <i>dgoT</i>                 | c.442A>G      | p.Arg148Gly       |            |
|                       |            | G            | G1       | deletion           | g.2391346..2391356          | <i>galS</i>                 |               |                   |            |
|                       |            |              |          | complex            | g.3174563..3174662          | <i>grlR</i>                 |               |                   |            |

**Supplemental table 1. Changes in the *C. rodentium* genome following mouse expansion.**

Whole genome sequencing was used to detect variations in the *C. rodentium* genome after expansion and selection in mice. 3 clones (colonies) from the STAMP-CR69K library were compared to isolates from the feces of infected mice (1 colony per mouse). No variants (“none”) detected in 4/6 isolates from SPF (specific pathogen free) animals 5 days p. i., 2/4 isolates from germ-free animals 5 days p. i., and 0/8 isolates from germ-free animals 20 days p.i. 4 cohoused germ-free animals 20 days p. i. (C1-4) had identical (clonal) isolates. These data were filtered to only include high confidence variants (present in >90% of reads).

## Supplemental table 2

| Aim                                                                      | 5' -> 3'                                                                   |
|--------------------------------------------------------------------------|----------------------------------------------------------------------------|
| Clone ~800bp of <i>C. rodentium</i> intergenic DNA into pKD4             | cttcggaataggaactaaggaggatattcaGTCTGACGCCGGTATCTGTA<br>ATGC                 |
|                                                                          | acggctgacatgggaattagccatggtccaAAAAAGCGCCGGGTGGCG                           |
| Check insertion into pKD4                                                | gcgggactctggggttcgaa                                                       |
|                                                                          | cgcagttcaacctgttgata                                                       |
| Clone <i>C. rodentium</i> ~800bp and KanR from pKD4 into pDS132 with 20n | ATATGTGATGGGTAAAAAGGATCGATCCTnnnnnnnnnnnnnnnn<br>nnnnntcacgctgccgcaagcactc |
|                                                                          | cgggagagctcgatatcgcatgcggtacctaaaaagcgccgggtggcggcttcgc                    |
| Check insertion into pDS132                                              | CAGAAAATATCATAATATCT                                                       |
|                                                                          | ACATGTGGAATTGTGAGCGG                                                       |
|                                                                          | GATTTGCAGACTACGGGCCTAAAG                                                   |
|                                                                          | GTGAGCGGATAACAATTTGTGG                                                     |
| Check integration into genome                                            | GATTTGCAGACTACGGGCCT                                                       |
|                                                                          | ctggaggatgaggggcggtatgattggtcgaacctctgc                                    |

### Supplemental table 2. Primers used in the creation of STAMP-CR253.



### Supplemental table 3

| Name  | 5' -> 3'                                                                                       |
|-------|------------------------------------------------------------------------------------------------|
| AD001 | CAAGCAGAAGACGGCATAACGAGATCGTGATGTGACTGGAGTTCAGACGTGTGCTCTTCCGATCAGATC<br>CTTGGCGGCAAGAAA       |
| AD002 | CAAGCAGAAGACGGCATAACGAGATACATCGGTGACTGGAGTTCAGACGTGTGCTCTTCCGATCAGATC<br>CTTGGCGGCAAGAAA       |
| AD003 | CAAGCAGAAGACGGCATAACGAGATGCCTAAGTGACTGGAGTTCAGACGTGTGCTCTTCCGATCAGATC<br>CTTGGCGGCAAGAAA       |
| AD004 | CAAGCAGAAGACGGCATAACGAGATTGGTCAGTGACTGGAGTTCAGACGTGTGCTCTTCCGATCAGATC<br>CTTGGCGGCAAGAAA       |
| AD005 | CAAGCAGAAGACGGCATAACGAGATCACTGTGTGACTGGAGTTCAGACGTGTGCTCTTCCGATCAGATC<br>CTTGGCGGCAAGAAA       |
| AD006 | CAAGCAGAAGACGGCATAACGAGATATTGGCGTGACTGGAGTTCAGACGTGTGCTCTTCCGATCAGATC<br>CTTGGCGGCAAGAAA       |
| AD007 | CAAGCAGAAGACGGCATAACGAGATGATCTGGTGACTGGAGTTCAGACGTGTGCTCTTCCGATCAGATC<br>CTTGGCGGCAAGAAA       |
| AD008 | CAAGCAGAAGACGGCATAACGAGATCAAGTGTGACTGGAGTTCAGACGTGTGCTCTTCCGATCAGATC<br>CTTGGCGGCAAGAAA        |
| AD009 | CAAGCAGAAGACGGCATAACGAGATCTGATCGTGACTGGAGTTCAGACGTGTGCTCTTCCGATCAGATC<br>CTTGGCGGCAAGAAA       |
| AD010 | CAAGCAGAAGACGGCATAACGAGATAAGCTAGTGACTGGAGTTCAGACGTGTGCTCTTCCGATCAGATC<br>CTTGGCGGCAAGAAA       |
| AD011 | CAAGCAGAAGACGGCATAACGAGATGTAGCCGTGACTGGAGTTCAGACGTGTGCTCTTCCGATCAGAT<br>CCTTGGCGGCAAGAAA       |
| AD012 | CAAGCAGAAGACGGCATAACGAGATTACAAGTGACTGGAGTTCAGACGTGTGCTCTTCCGATCAGATC<br>CTTGGCGGCAAGAAA        |
| AD013 | CAAGCAGAAGACGGCATAACGAGATTTGACTGTGACTGGAGTTCAGACGTGTGCTCTTCCGATCAGATC<br>CTTGGCGGCAAGAAA       |
| AD014 | CAAGCAGAAGACGGCATAACGAGATGGAAGTGTGACTGGAGTTCAGACGTGTGCTCTTCCGATCAGAT<br>CCTTGGCGGCAAGAAA       |
| AD015 | CAAGCAGAAGACGGCATAACGAGATTGACATGTGACTGGAGTTCAGACGTGTGCTCTTCCGATCAGATC<br>CTTGGCGGCAAGAAA       |
| AD016 | CAAGCAGAAGACGGCATAACGAGATGGACGGGTGACTGGAGTTCAGACGTGTGCTCTTCCGATCAGAT<br>CCTTGGCGGCAAGAAA       |
| AD018 | CAAGCAGAAGACGGCATAACGAGATGCGGACGTGACTGGAGTTCAGACGTGTGCTCTTCCGATCAGAT<br>CCTTGGCGGCAAGAAA       |
| AD019 | CAAGCAGAAGACGGCATAACGAGATTTTACGTGACTGGAGTTCAGACGTGTGCTCTTCCGATCAGATC<br>CTTGGCGGCAAGAAA        |
| AD020 | CAAGCAGAAGACGGCATAACGAGATGGCCACGTGACTGGAGTTCAGACGTGTGCTCTTCCGATCAGAT<br>CCTTGGCGGCAAGAAA       |
| Var11 | AATGATACGGCGACCACCGAGATCTAAGTCTTTCCCTACACGACGCTCTTCCGATCTGATGGGTAA<br>AAAGGATCGATCC            |
| Var12 | AATGATACGGCGACCACCGAGATCTAAGTCTTTCCCTACACGACGCTCTTCCGATCTAGATGGGTAA<br>AAAAGGATCGATCC          |
| Var13 | AATGATACGGCGACCACCGAGATCTAAGTCTTTCCCTACACGACGCTCTTCCGATCTTACGATGGGT<br>TAAAAGGATCGATCC         |
| Var14 | AATGATACGGCGACCACCGAGATCTAAGTCTTTCCCTACACGACGCTCTTCCGATCTGCTAGATGGG<br>TAAAAGGATCGATCC         |
| Var15 | AATGATACGGCGACCACCGAGATCTAAGTCTTTCCCTACACGACGCTCTTCCGATCTCGACTGGATG<br>GGTAAAAGGATCGATCC       |
| Var16 | AATGATACGGCGACCACCGAGATCTAAGTCTTTCCCTACACGACGCTCTTCCGATCTTAGCGTAGAT<br>GGGTAAAAGGATCGATCC      |
| Var17 | AATGATACGGCGACCACCGAGATCTAAGTCTTTCCCTACACGACGCTCTTCCGATCTTGCTGAGTCG<br>ATGGGTAAAAGGATCGATCC    |
| Var18 | AATGATACGGCGACCACCGAGATCTAAGTCTTTCCCTACACGACGCTCTTCCGATCTGCTGATAGTA<br>GATGGGTAAAAGGATCGATCC   |
| Var19 | AATGATACGGCGACCACCGAGATCTAAGTCTTTCCCTACACGACGCTCTTCCGATCTCAACTGCGTA<br>GCGATGGGTAAAAGGATCGATCC |

|       |                                                                                                   |
|-------|---------------------------------------------------------------------------------------------------|
| Var20 | AATGATACGGCGACCACCGAGATCTACACTCTTTCCCTACACGACGCTCTTCCGATCTATGACCGTCT<br>CGAGATGGGTAAAAAGGATCGATCC |
| var21 | AATGATACGGCGACCACCGAGATCTACACTCTTTCCCTACACGACGCTCTTCCGATCTAATGATGGGT<br>TAAAAAGGATCGATCC          |
| var22 | AATGATACGGCGACCACCGAGATCTACACTCTTTCCCTACACGACGCTCTTCCGATCTATGCGATGGG<br>TAAAAAGGATCGATCC          |
| var23 | AATGATACGGCGACCACCGAGATCTACACTCTTTCCCTACACGACGCTCTTCCGATCTTGCACGATGG<br>GTAAAAAGGATCGATCC         |
| var24 | AATGATACGGCGACCACCGAGATCTACACTCTTTCCCTACACGACGCTCTTCCGATCTTCATTGATG<br>GGTAAAAAGGATCGATCC         |
| var25 | AATGATACGGCGACCACCGAGATCTACACTCTTTCCCTACACGACGCTCTTCCGATCTGAATCGAGAT<br>GGGTAAAAAGGATCGATCC       |
| var26 | AATGATACGGCGACCACCGAGATCTACACTCTTTCCCTACACGACGCTCTTCCGATCTGTCAACTTGAT<br>GGGTAAAAAGGATCGATCC      |
| var27 | AATGATACGGCGACCACCGAGATCTACACTCTTTCCCTACACGACGCTCTTCCGATCTCGGCGTGGCG<br>ATGGGTAAAAAGGATCGATCC     |
| var28 | AATGATACGGCGACCACCGAGATCTACACTCTTTCCCTACACGACGCTCTTCCGATCTCCTGTACCTT<br>GATGGGTAAAAAGGATCGATCC    |

**Supplemental table 3. Primers used for STAMP sequencing.**
